# Supplementary material
Source: PubMed Central journal article supplement (PMC3321171)

# Figure 2A

WB: STAT3

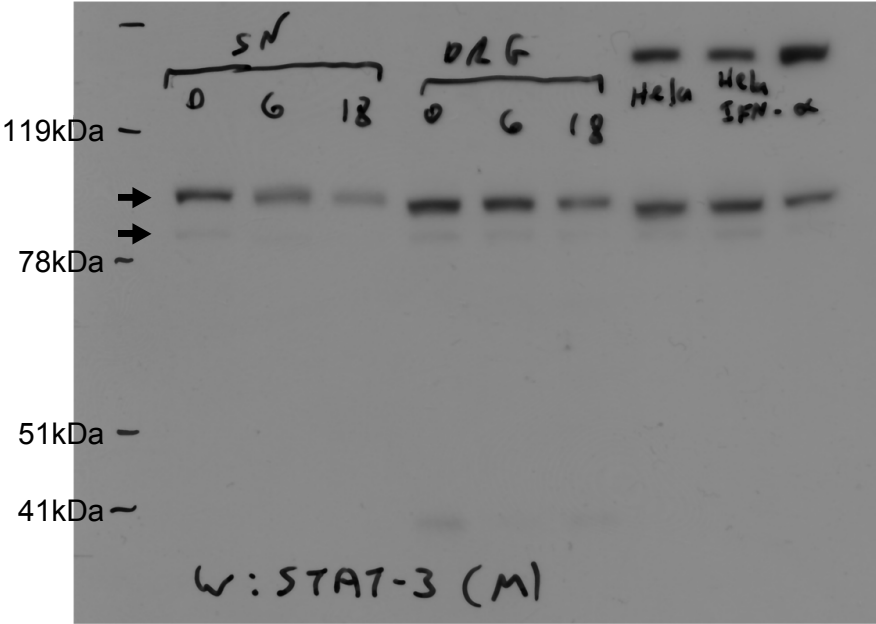

WB: pSTAT3

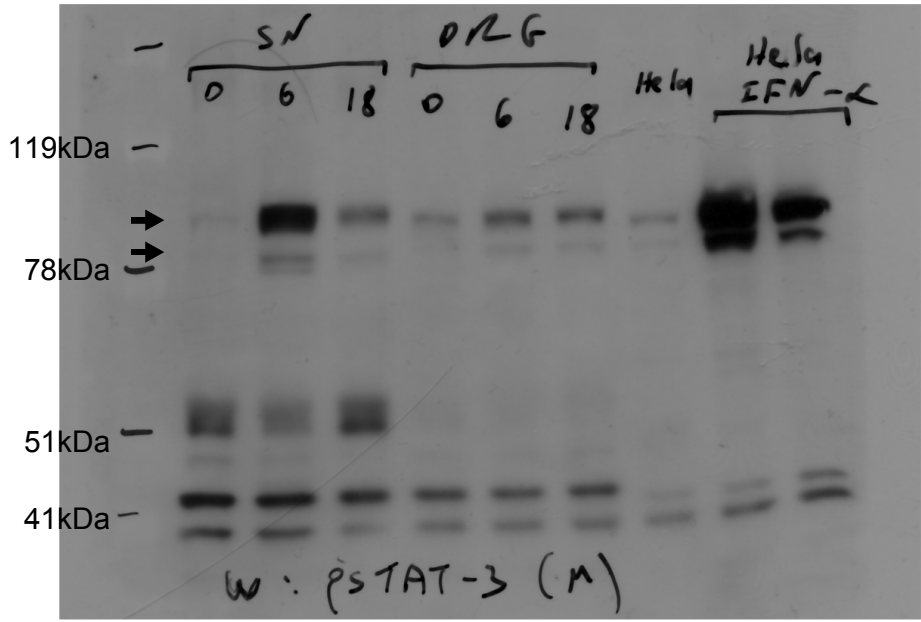

WB: ERK

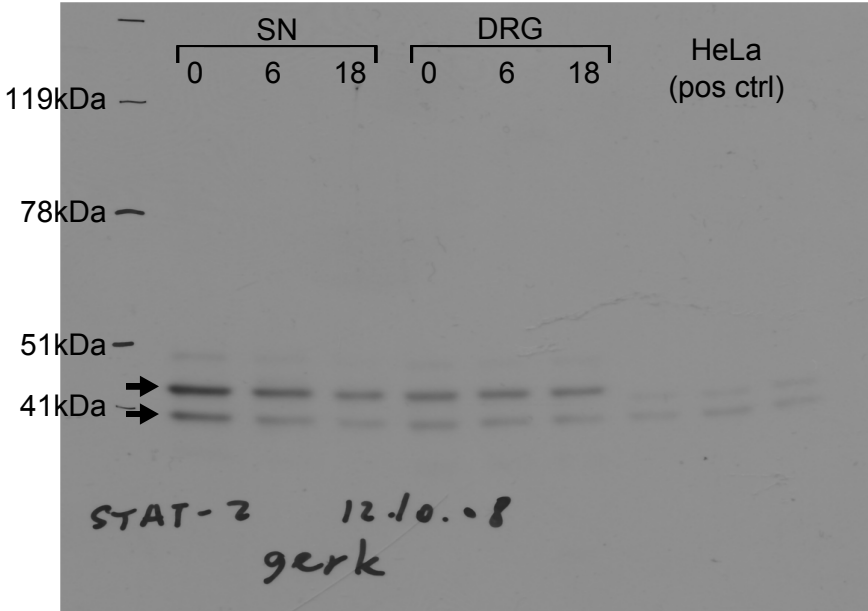

# Figure 2B

WB: STAT3

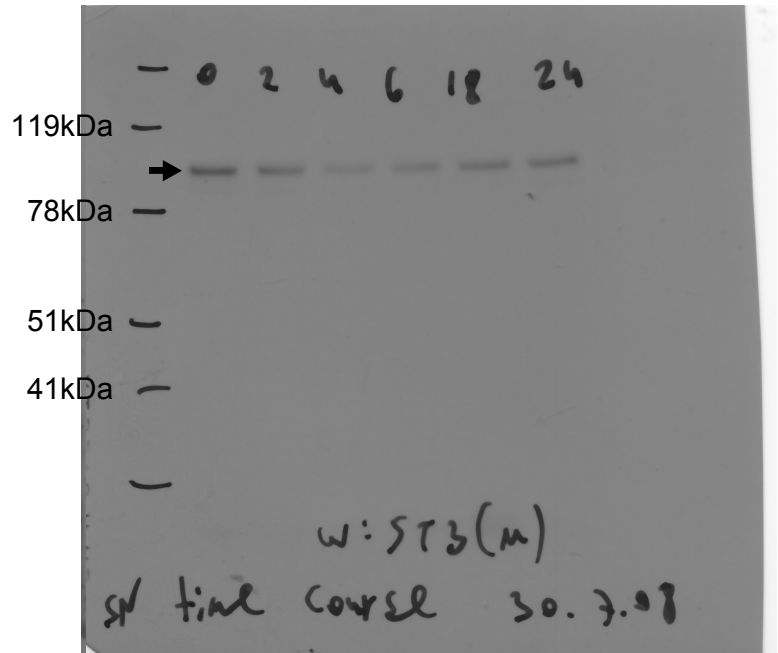

WB: pSTAT3

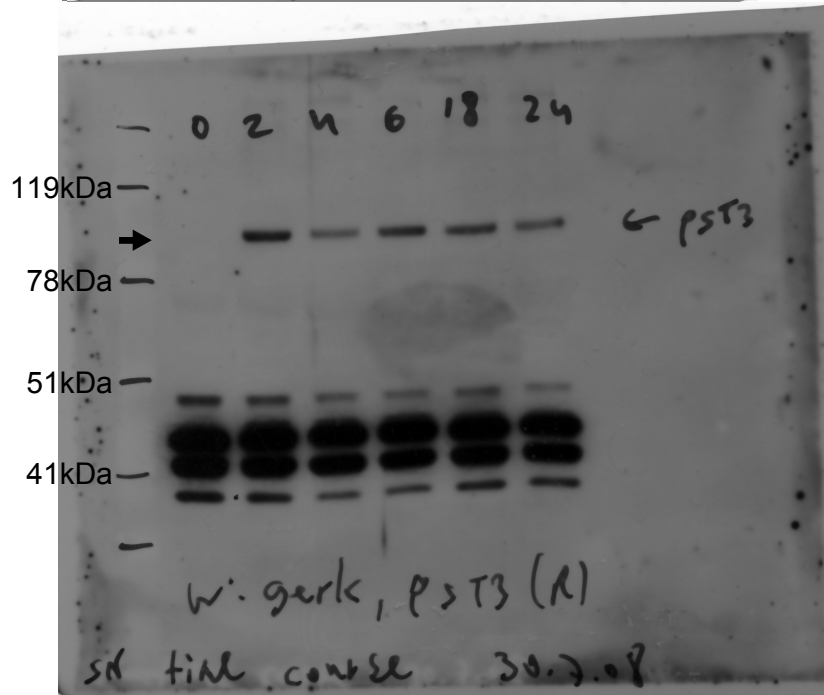

WB: ERK

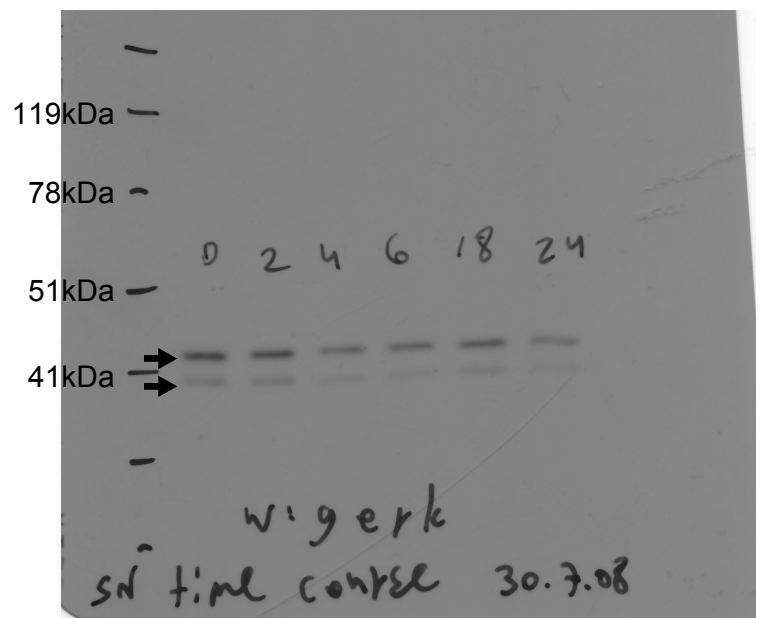

Supplement: emboj2011494s5.pdf [file emboj2011494s5.pdf]
